# Supplementary material for: KIR2DL2/DL3+NKs and Helios+Tregs in Peripheral Blood Predict Nivolumab Response in Patients with Metastatic Renal Cell Cancer
Source: PubMed Central journal article supplement — Clin Cancer Res. 2024 Aug 21;30(20):4755–67. doi: 10.1158/1078-0432.CCR-24-0729 (PMC11474171; doi:10.1158/1078-0432.ccr-24-0729), 2024-08-21
Supplement: ccr-24-0729_supplementary_figure_s1_suppfs1.pdf [file ccr-24-0729_supplementary_figure_s1_suppfs1.pdf]

**A**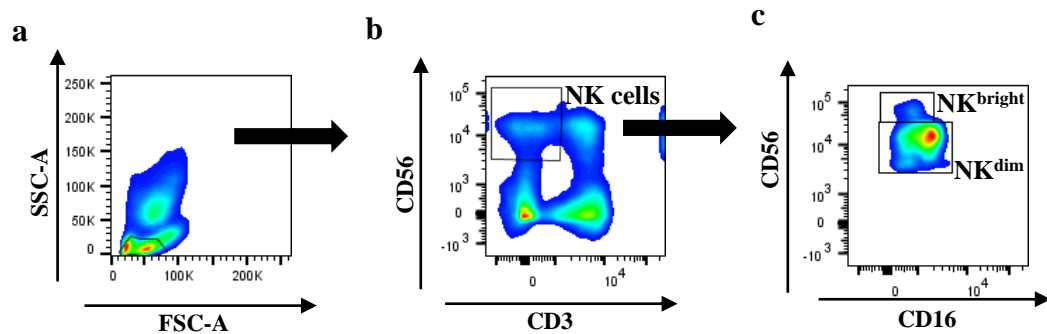**B**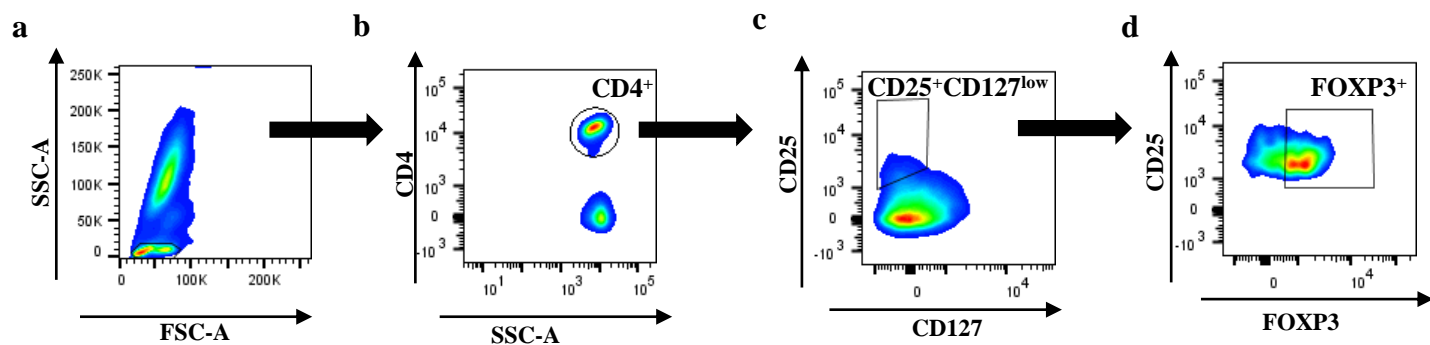

**Supplementary Figure S1. Gating strategy for identification of Tregs and NKs in peripheral blood.**

(A) NKs: (a) Lymphocyte gate on FSC/SSC (b) identification CD3<sup>+</sup>CD56<sup>+</sup> (total NKs) (c) identification of CD3<sup>+</sup>CD56<sup>dim</sup>CD16<sup>+</sup> (NKs<sup>dim</sup>) and CD3<sup>+</sup>CD56<sup>bright</sup>CD16<sup>-/+</sup> (NKs<sup>bright</sup>). (B) Tregs: (a) Lymphocyte gate on FSC/SSC (b) identification of CD4<sup>+</sup> T cells within lymphocyte population (c) identification of CD4<sup>+</sup>CD25<sup>+</sup>CD127<sup>low</sup> (d) identification of CD4<sup>+</sup>CD25<sup>+</sup>CD127<sup>low</sup>Foxp3<sup>+</sup>.
