# Supplementary material for: KIR2DL2/DL3+NKs and Helios+Tregs in Peripheral Blood Predict Nivolumab Response in Patients with Metastatic Renal Cell Cancer
Source: PubMed Central journal article supplement — Clin Cancer Res. 2024 Aug 21;30(20):4755–67. doi: 10.1158/1078-0432.CCR-24-0729 (PMC11474171; doi:10.1158/1078-0432.ccr-24-0729), 2024-08-21
Supplement: ccr-24-0729_supplementary_figure_s2_suppfs2.pdf [file ccr-24-0729_supplementary_figure_s2_suppfs2.pdf]

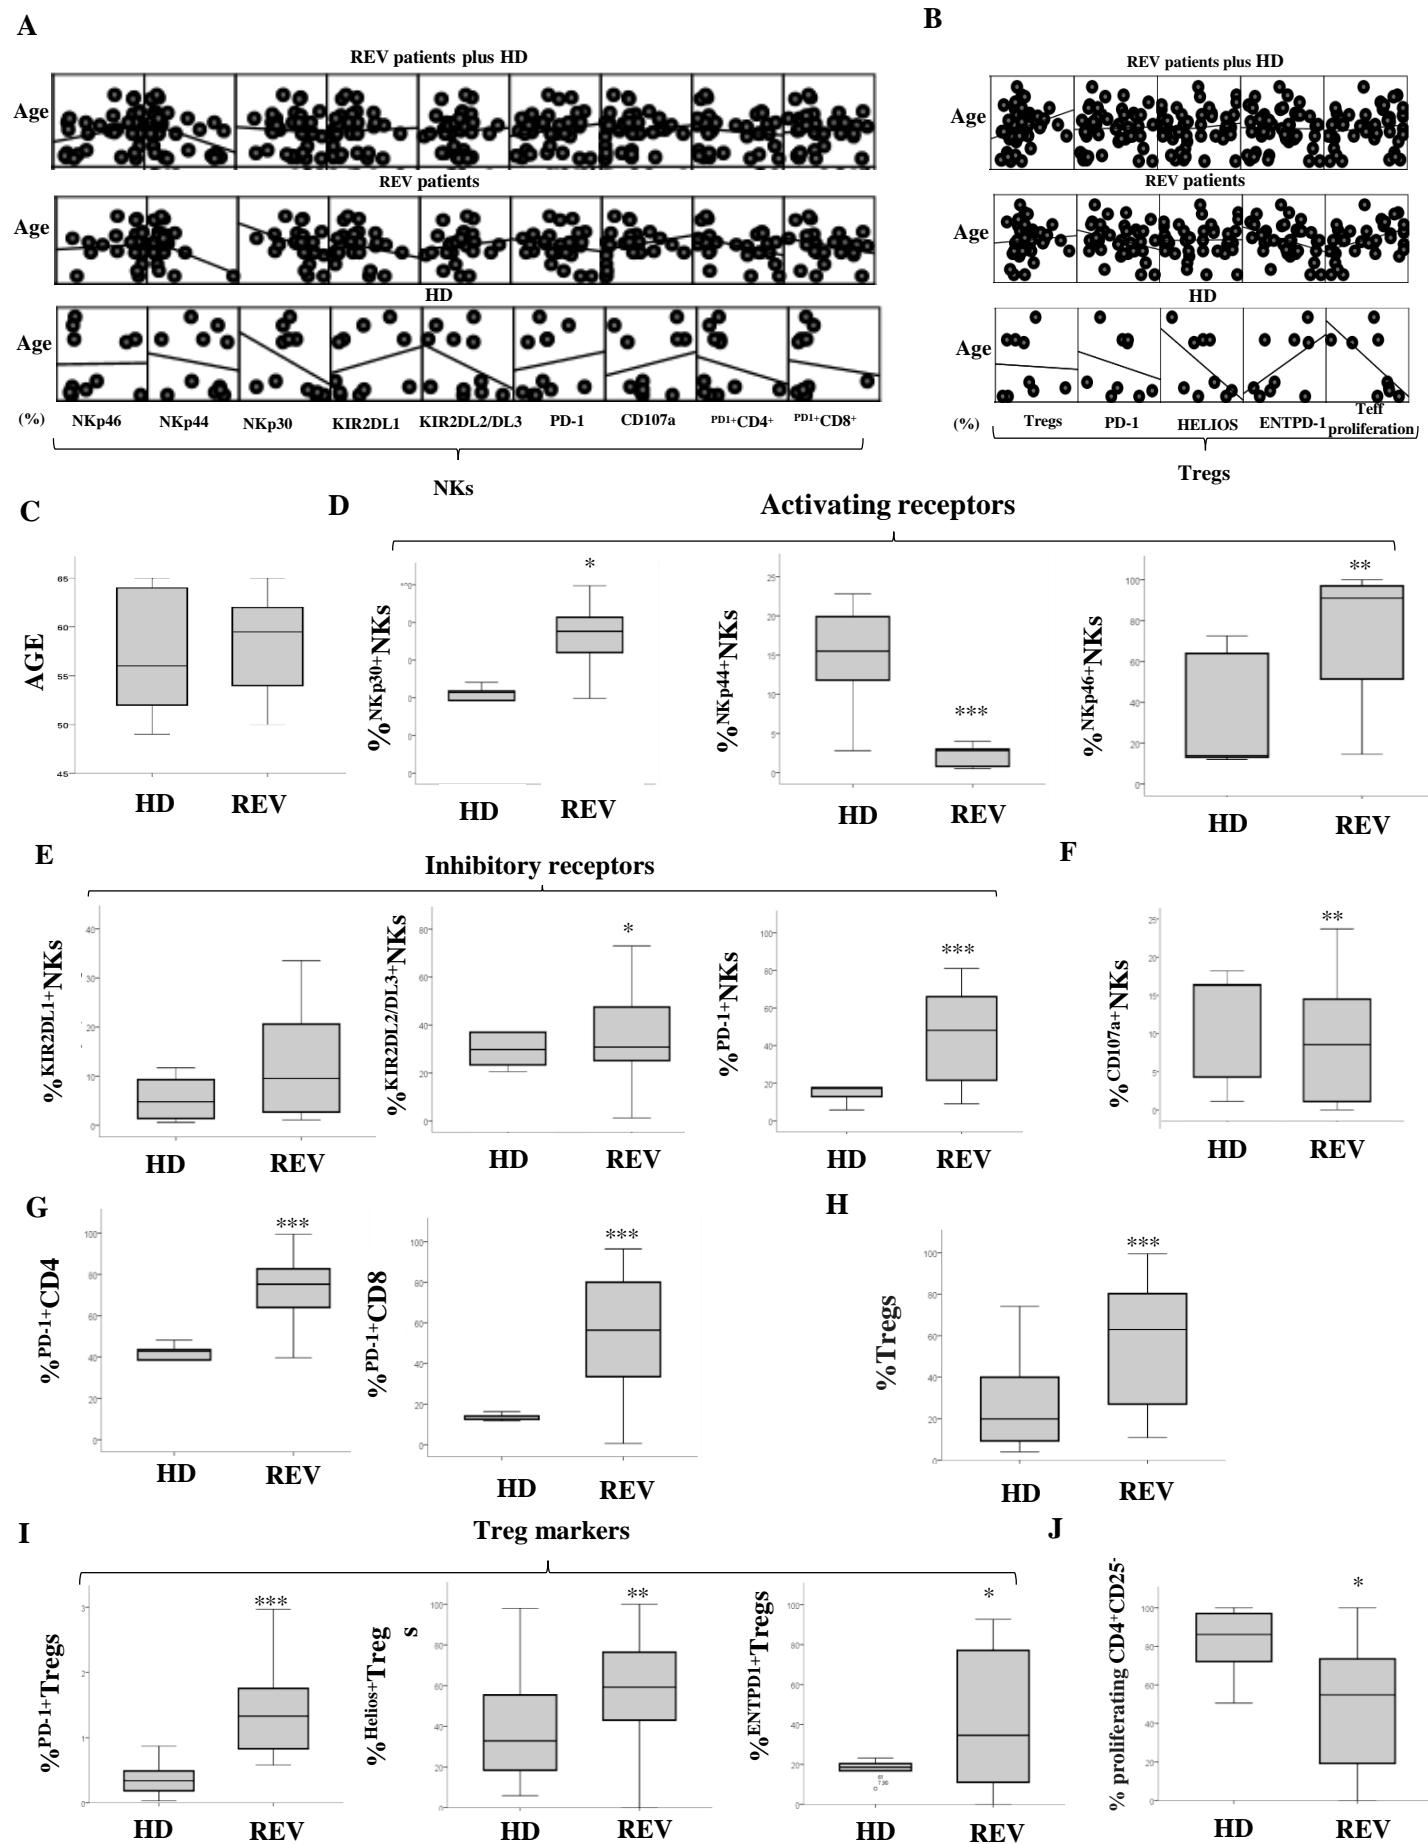

**Supplementary Figure S2. Correlation between age and pretreatment NKs and Tregs immune subsets cells in mRCC-REV patients and HDs.** Scatter plots from Kendall's rank correlation between age and both pretreatment blood lymphocyte immune cell population (A) NKs and (B) Tregs over the entire cohort (REV+HD) or mRCC-REV patients and HDs. Box and Whisker plot of HD (n=33) and REV (n=33) comparison in (C) age-matched subset from original cohort ranged from 49 and 65 years-old (D) activating NK cell receptors inhibitory NK (E) cell receptors (F) CD107a degranulation (G)  $PD1+CD4$  and  $PD1+CD8$  T cells (H) Tregs (I) Tregs markers and (J). Tregs dependent T cell effector proliferation. Mann-Whitney test, (\* $p < 0.05$ ; \*\* $p < 0.01$ ; \*\*\* $p < 0.001$ ).
