# Supplementary material for: KIR2DL2/DL3+NKs and Helios+Tregs in Peripheral Blood Predict Nivolumab Response in Patients with Metastatic Renal Cell Cancer
Source: PubMed Central journal article supplement — Clin Cancer Res. 2024 Aug 21;30(20):4755–67. doi: 10.1158/1078-0432.CCR-24-0729 (PMC11474171; doi:10.1158/1078-0432.ccr-24-0729), 2024-08-21
Supplement: ccr-24-0729_supplementary_figure_s3_suppfs3.pdf [file ccr-24-0729_supplementary_figure_s3_suppfs3.pdf]

## Activating receptors

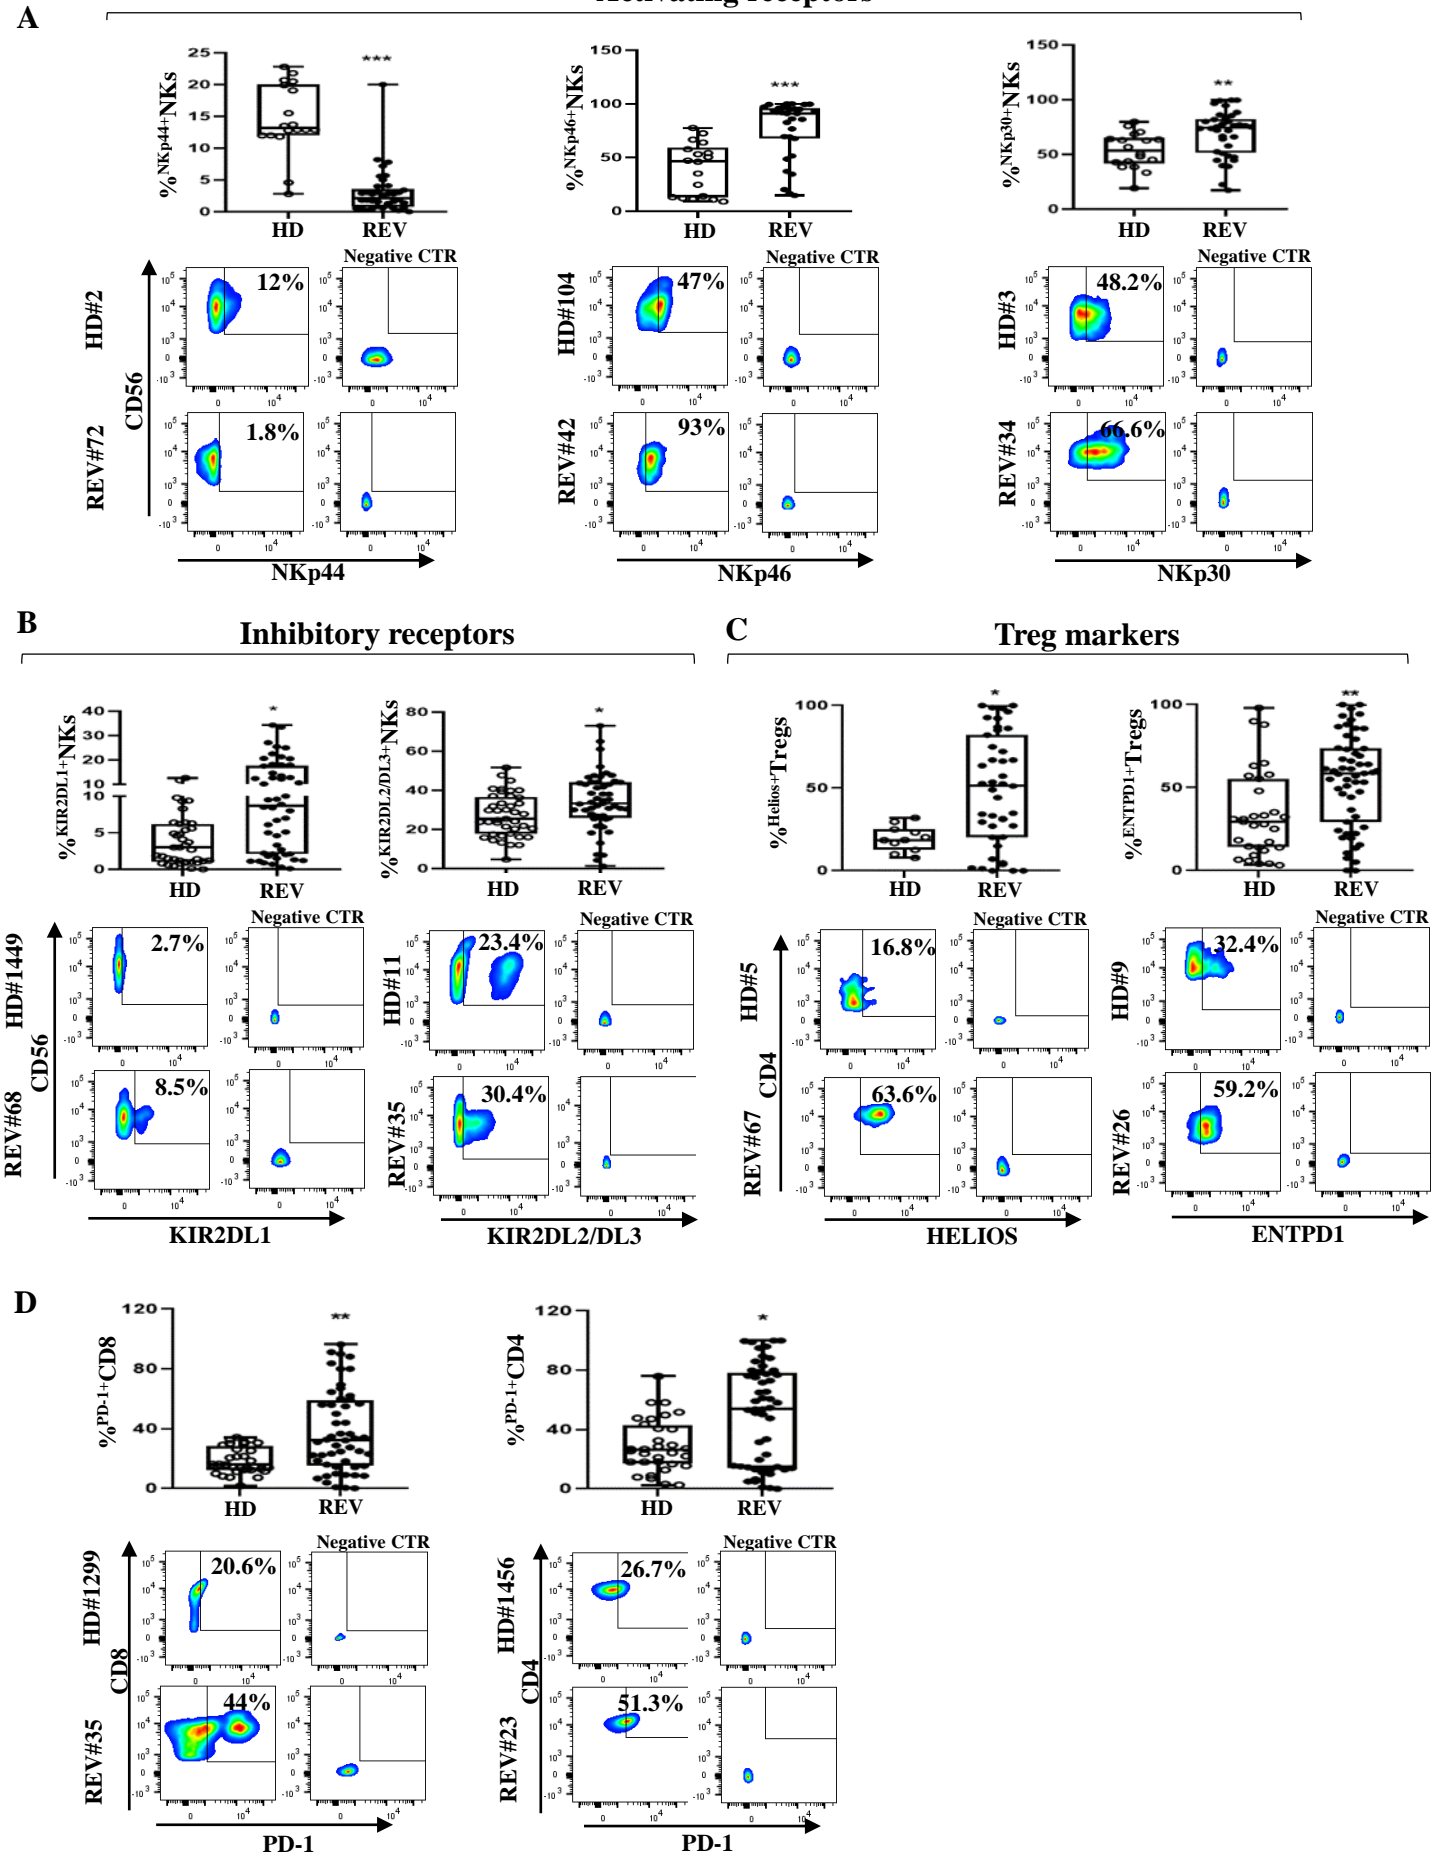

**Supplementary Figure S3. Pretreatment NKs and Tregs in mRCC-REV patients.** (A) Upper: frequency of  $\text{NKp44}^+\text{NKs}$ ,  $\text{NKp46}^+\text{NKs}$  and  $\text{NKp30}^+\text{NKs}$  in HD and REV patients.  $\text{NKp44}^+\text{NKs}$ : HD (n=18) vs REV (n=38),  $p < 0.001$ ;  $\text{NKp46}^+\text{NKs}$ : HD (n=18) vs REV (n=31),  $p < 0.001$ ,  $\text{NKp30}^+\text{NKs}$ : HD (n=18) vs REV (n=36),  $p < 0.01$ . Lower: representative comparison between HD#2 and REV#72; HD#104 and REV#42; HD#3 and REV#34 with negative controls; (B) Upper: frequency of  $\text{KIR2DL1}^+\text{NKs}$  and  $\text{KIR2DL2/DL3}^+\text{NKs}$  in HD and REV patients.  $\text{KIR2DL1}^+\text{NKs}$ : HD (n=37) vs REV (n=50),  $p < 0.001$ ;  $\text{KIR2DL2/DL3}^+\text{NKs}$ : HD (n=39) vs REV (n=51),  $p < 0.05$ . Lower: representative comparison between HD#1449 and REV#68; HD#11 and REV#35 with negative controls; (C) Upper: frequency of  $\text{Helios}^+\text{Tregs}$  and  $\text{ENTPD1}^+\text{Tregs}$  in HD and REV patients.  $\text{Helios}^+\text{Tregs}$ : HD (n=11) vs REV (n=43),  $p < 0.05$ ,  $\text{ENTPD1}^+\text{Tregs}$ : HD (n=31) vs REV (n=55),  $p < 0.01$ . Lower: representative comparison between HD#5 and REV#67; HD#9 and REV#26 with negative controls; (D) Upper:  $\text{PD-1}^+\text{CD8}$  and  $\text{PD-1}^+\text{CD4}$  cells in HD and REV groups.  $\text{PD-1}^+\text{CD8}$ : HD (n=32) vs REV (n=52),  $p < 0.01$ ,  $\text{PD-1}^+\text{CD4}$ : HD (n=32) vs REV (n=53),  $p < 0.05$ . Lower: representative comparison between HD1299 and REV#35; HD#1456 and REV#23 with negative controls. Box plot showing the data distribution across groups with minimum, median, and maximum value. Two tailed test comparison of differences between two independent groups (\* $p < 0.05$ ; \*\* $p < 0.01$ ; \*\*\* $p < 0.001$ ).
