# Supplementary material for: KIR2DL2/DL3+NKs and Helios+Tregs in Peripheral Blood Predict Nivolumab Response in Patients with Metastatic Renal Cell Cancer
Source: PubMed Central journal article supplement — Clin Cancer Res. 2024 Aug 21;30(20):4755–67. doi: 10.1158/1078-0432.CCR-24-0729 (PMC11474171; doi:10.1158/1078-0432.ccr-24-0729), 2024-08-21
Supplement: ccr-24-0729_supplementary_figure_s4_suppfs4.pdf [file ccr-24-0729_supplementary_figure_s4_suppfs4.pdf]

**A**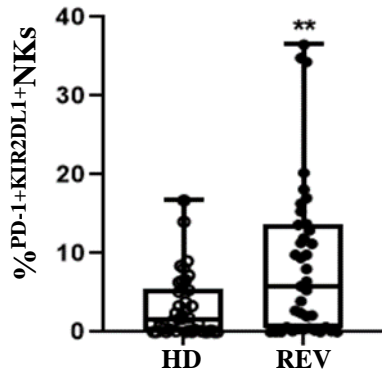**B**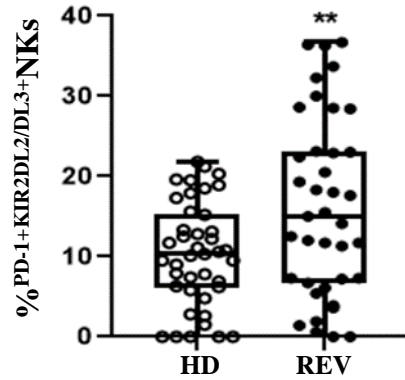

**Supplementary Figure S4. Pretreatment NKs co-expression of PD-1 and KIR2DL1 or KIR2DL2/DL3 in mRCC-REV patients.** % of co-expression of PD-1 and KIR2DL1 or KIR2DL2/DL3 on NK cells in the HD and REV groups. **(A)** %<sup>PD-1+KIR2DL1+NKs</sup>: HD (n=41) vs REV (n=39), p<0.05; **(B)** %<sup>PD-1+KIR2DL2/DL3+NKs</sup>: HD (n=41) vs REV (n=39), p<0.01. Box plot showing the data distribution across groups with minimum, median, and maximum value. Two tailed test comparison of differences between two independent groups (\*p<0.05; \*\*p<0.01; \*\*\*p<0.001).
