# Supplementary material for: KIR2DL2/DL3+NKs and Helios+Tregs in Peripheral Blood Predict Nivolumab Response in Patients with Metastatic Renal Cell Cancer
Source: PubMed Central journal article supplement — Clin Cancer Res. 2024 Aug 21;30(20):4755–67. doi: 10.1158/1078-0432.CCR-24-0729 (PMC11474171; doi:10.1158/1078-0432.ccr-24-0729), 2024-08-21
Supplement: ccr-24-0729_supplementary_figure_s5_suppfs5.pdf [file ccr-24-0729_supplementary_figure_s5_suppfs5.pdf]

A

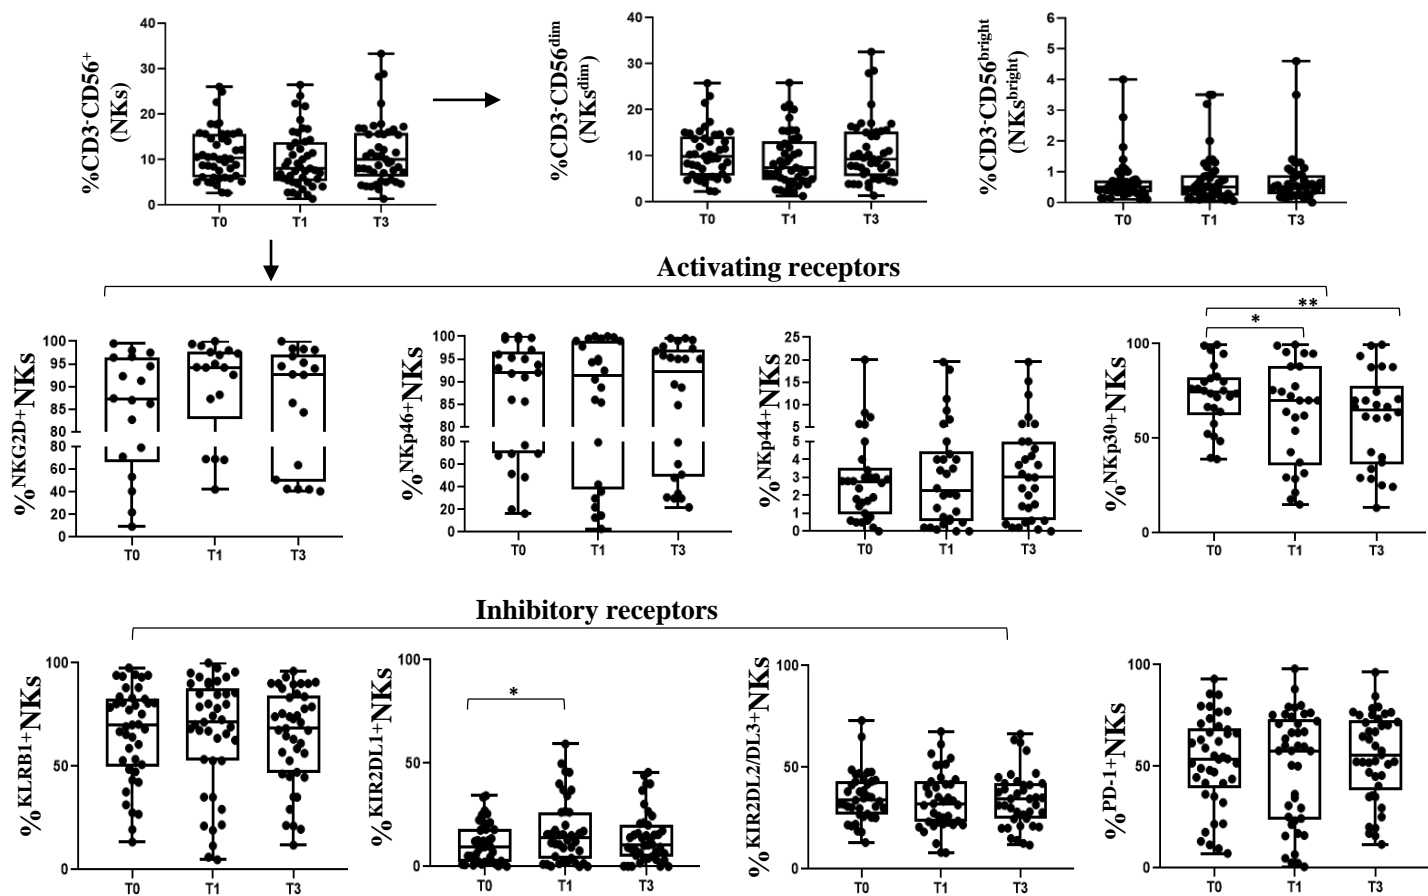

B

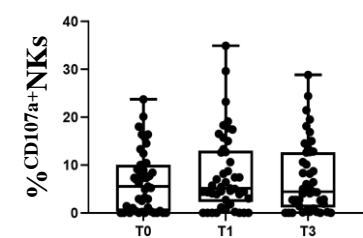

C

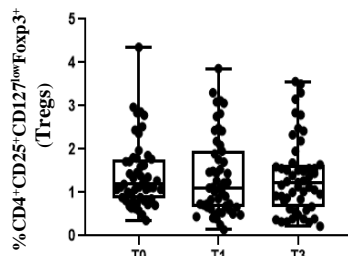

D

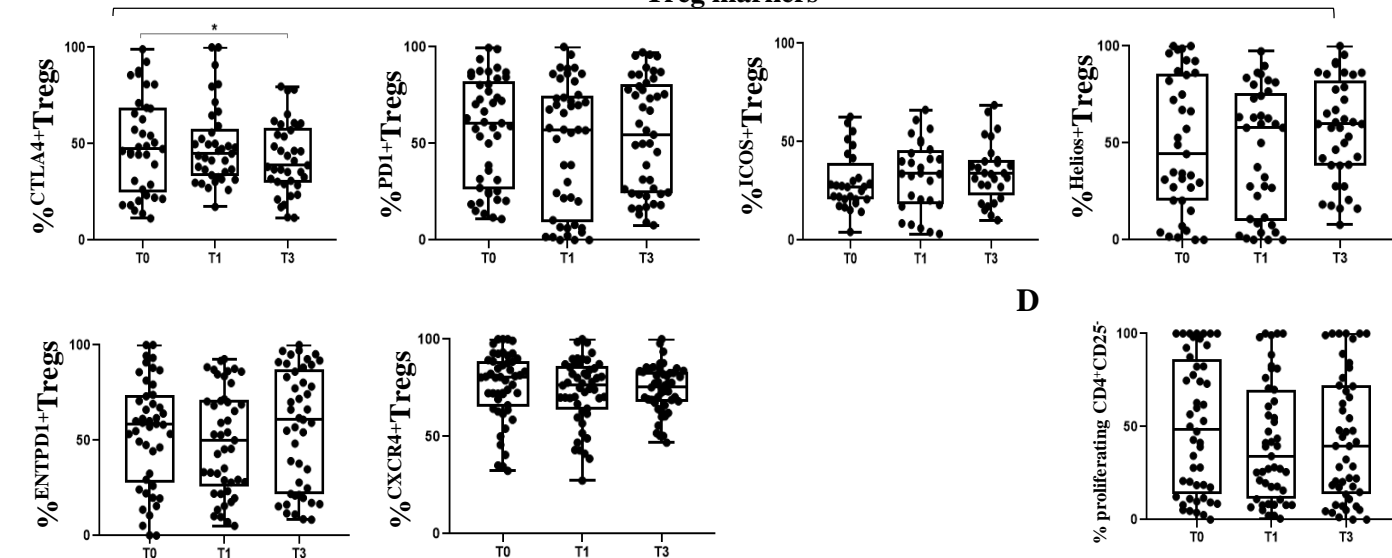

D

**Supplementary Figure S5. Nivolumab did not significantly affect peripheral NKs and Tregs.** (A) Distribution of NKs-NK<sup>dim</sup>-NK<sup>bright</sup> (n=45); activating receptor: NKG2D<sup>+</sup>NKs (n=19), NKp46<sup>+</sup>NKs (n=24), NKp44<sup>+</sup>NKs (n=30), NKp30<sup>+</sup>NKs (n=26); inhibitory receptors: KLRB1<sup>+</sup>NKs (n=41), KIR2DL1<sup>+</sup>NKs (n=42), KIR2DL2/DL3<sup>+</sup>NKs (n=39); PD-1<sup>+</sup>NKs (n=41). (B) Analysis of CD107a degranulation over time. (C) Distribution of Tregs (n=51) and Treg markers: CTLA-4<sup>+</sup>Tregs (n=37), PD-1<sup>+</sup>Tregs (n=45), ICOS<sup>+</sup>Tregs (n=28), Helios<sup>+</sup>Tregs (n=37), ENTPD1<sup>+</sup>Tregs (n=46), CXCR4<sup>+</sup>Tregs (n=49). (D) CFSE-Teff proliferation/Tregs (n=48). Box plot showing the data distribution across groups with minimum, median, and maximum value. Two-tailed test comparison of differences between two independent groups (\*p<0.05; \*\*p<0.01; \*\*\*p<0.001).
