# Supplementary material for: KIR2DL2/DL3+NKs and Helios+Tregs in Peripheral Blood Predict Nivolumab Response in Patients with Metastatic Renal Cell Cancer
Source: PubMed Central journal article supplement — Clin Cancer Res. 2024 Aug 21;30(20):4755–67. doi: 10.1158/1078-0432.CCR-24-0729 (PMC11474171; doi:10.1158/1078-0432.ccr-24-0729), 2024-08-21
Supplement: ccr-24-0729_supplementary_figure_s8_suppfs8.pdf [file ccr-24-0729_supplementary_figure_s8_suppfs8.pdf]

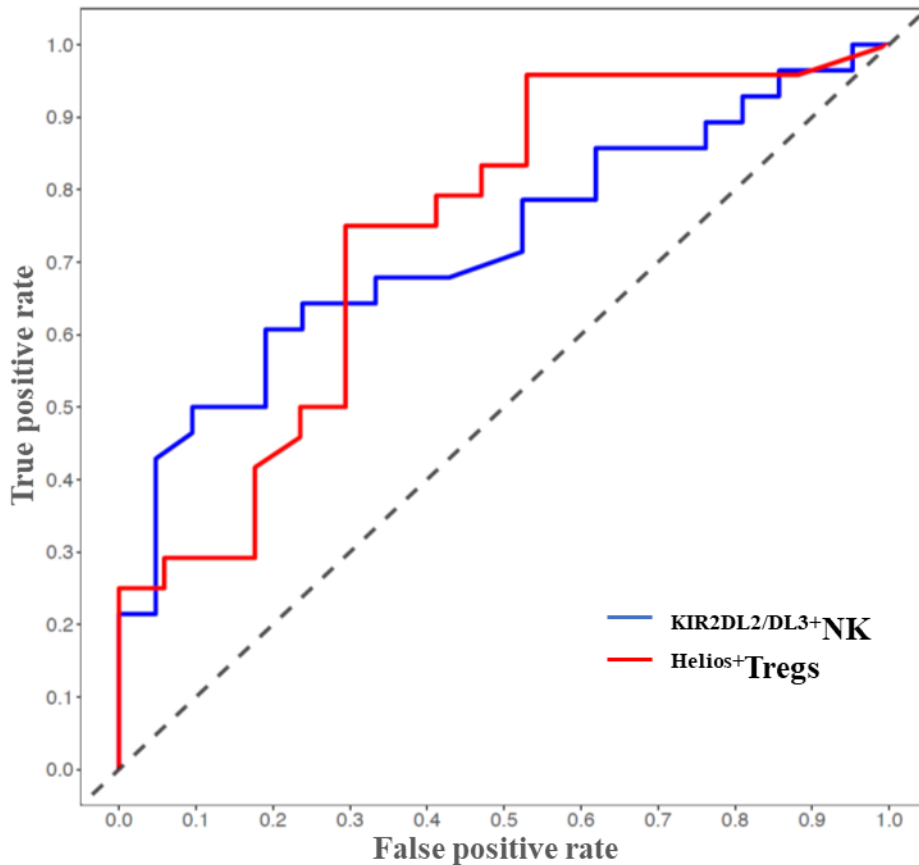

DeLong's test for two correlated ROC curves

Z=-0.163, p=0.871

Model: Three-months clinical response – Helios+Tregs at pretreatment

Optimal Cut-off value: 34.3

AUC: 0.741(0.582-0.901), p<0.001

Model: Three-months clinical response – KIR2DL2/DL3+NKs at pretreatment

Optimal Cut-off value: 35.3

AUC: 0.724(0.581-0.866), p<0.001

**Supplementary Figure S8. .632+ cross validation bootstrap ROC curves and the optimum pretreatment cut-off values of KIR2DL2/DL3+NKs and Helios+Tregs to determine the outcome of REV patients.** The blue curve represents the ROC curve derived by selected cut-off point of 35.3 on the baseline level of KIR2DL2/DL3+NKs, with AUC estimated by .632+ cross validation equal to 0.724 (95%CI: 0.581-0.866) and p<0.001. Red curve represents the ROC curve derived by selected cut-off point of 34.3 on the pretreatment level of Helios+Tregs, with AUC estimated by .632+ cross validation equal to 0.741 (95%CI: 0.582-0.901) and p<0.001. Additionally, a DeLong's test statistics of the difference between ROC curves was performed with a not statistically significant result (p=0.871).
