# Supplementary material for: KIR2DL2/DL3+NKs and Helios+Tregs in Peripheral Blood Predict Nivolumab Response in Patients with Metastatic Renal Cell Cancer
Source: PubMed Central journal article supplement — Clin Cancer Res. 2024 Aug 21;30(20):4755–67. doi: 10.1158/1078-0432.CCR-24-0729 (PMC11474171; doi:10.1158/1078-0432.ccr-24-0729), 2024-08-21
Supplement: ccr-24-0729_supplementary_figure_s9_suppfs9.pdf [file ccr-24-0729_supplementary_figure_s9_suppfs9.pdf]

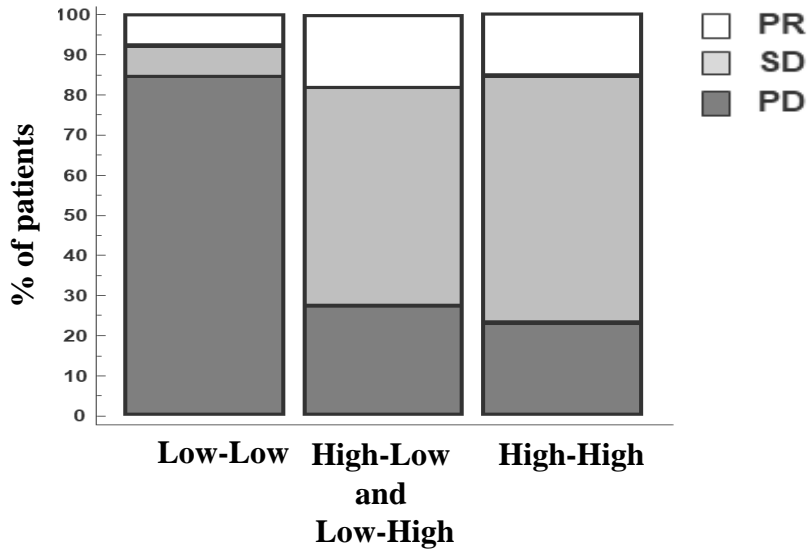

**Supplementary Figure S9. Association between the  $KIR2DL2/DL3+NKs/Helios+Tregs$  values and response to nivolumab treatment.** Using the optimal cut-off value of  $>35.3\%$  for  $KIR2DL2/DL3+NKs$  and  $>34.3\%$   $Helios+Tregs$ , patients were divided in three groups, Low-Low, High-Low, Low-High and High-High, and the percentage of nivolumab responses was reported.
