# Supplementary material for: KIR2DL2/DL3+NKs and Helios+Tregs in Peripheral Blood Predict Nivolumab Response in Patients with Metastatic Renal Cell Cancer
Source: PubMed Central journal article supplement — Clin Cancer Res. 2024 Aug 21;30(20):4755–67. doi: 10.1158/1078-0432.CCR-24-0729 (PMC11474171; doi:10.1158/1078-0432.ccr-24-0729), 2024-08-21
Supplement: ccr-24-0729_supplementary_figure_s10_suppfs10.pdf [file ccr-24-0729_supplementary_figure_s10_suppfs10.pdf]

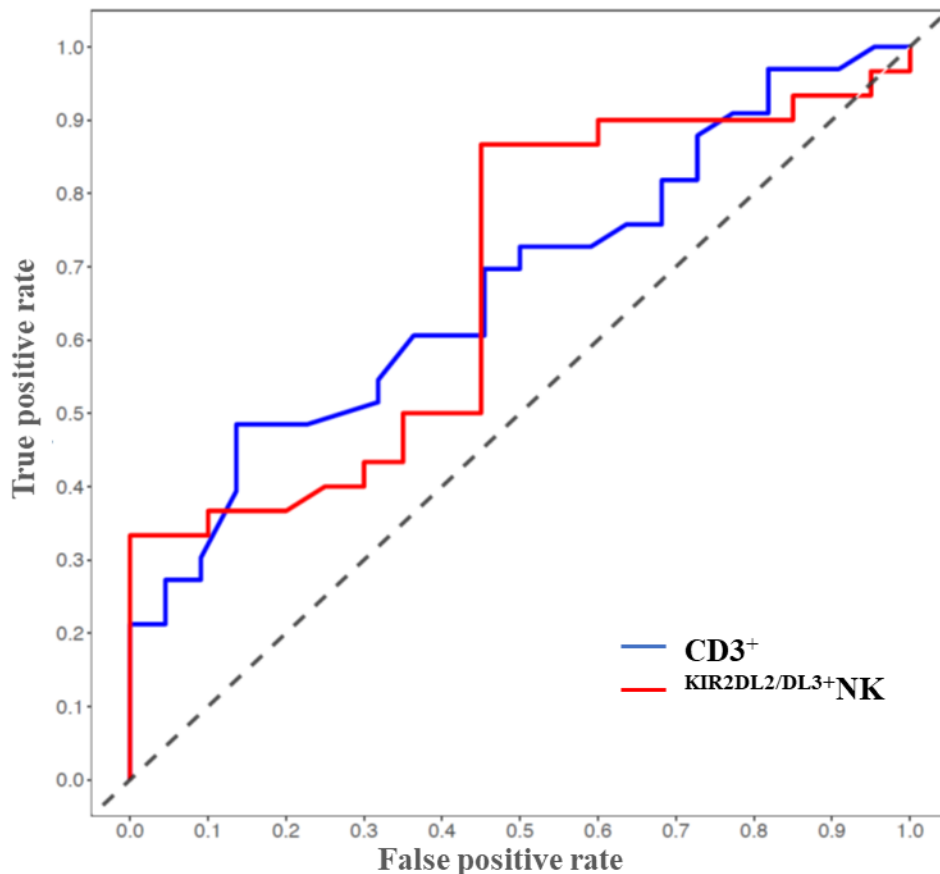

DeLong's test for two correlated ROC curves

Z=-0.05, p=0.961

Model: Three-months clinical response –  $KIR2DL2/DL3+NKs$  after 1 month

Optimal Cut-off value: 23.3

AUC: 0.677(0.523-0.832), p<0.001

Model: Three-months clinical response –  $CD3^+$  after 1 month

Optimal Cut-off value: 71

AUC: 0.672(0.529-0.815), p<0.001

**Supplementary Figure S10. .632+ cross validation bootstrap ROC curves and the optimum T1 cut-off values of  $CD3^+$  and  $KIR2DL2/DL3+NKs$  to determine the outcome of REV patients.** The blue curve represents the ROC curve derived by selected cut-off point of 71 on the  $CD3^+$  level after one month of nivolumab treatment, with AUC estimated by .632+ cross validation equal to 0.672 (95%CI: 0.529-0.815) and p<0.001. Red curve represents the ROC curve derived by selected cut-off point of 23.3 on the  $KIR2DL2/DL3+NKs$  level after one month of nivolumab treatment, with AUC estimated by .632+ cross validation equal to 0.677 (95%CI: 0.523-0.832) and p<0.001. Additionally, a DeLong's test statistics of the difference between ROC curves was performed with a not statistically significant result (p=0.961).
