# Supplementary material for: KIR2DL2/DL3+NKs and Helios+Tregs in Peripheral Blood Predict Nivolumab Response in Patients with Metastatic Renal Cell Cancer
Source: PubMed Central journal article supplement — Clin Cancer Res. 2024 Aug 21;30(20):4755–67. doi: 10.1158/1078-0432.CCR-24-0729 (PMC11474171; doi:10.1158/1078-0432.ccr-24-0729), 2024-08-21
Supplement: ccr-24-0729_supplementary_figure_s12_suppfs12.pdf [file ccr-24-0729_supplementary_figure_s12_suppfs12.pdf]

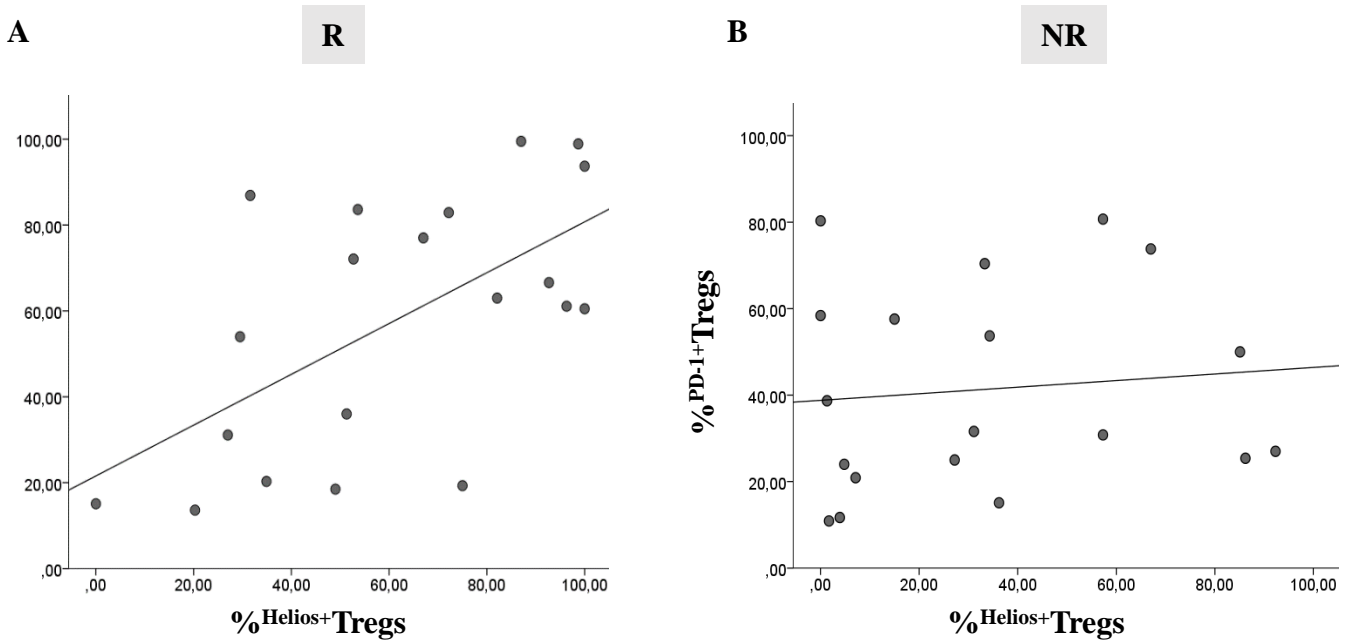

**Supplementary Figure S12. Correlation between pretreatment of PD-1+Tregs and Helios+Tregs in Responder and Not-Responder patients.** (A) Scatter plot of Kendall's rank correlation between pretreatment values of % Helios+Tregs and % PD-1+Tregs in Responder (Coefficient 0.396; p=0.015; N=20) and (B) Not Responder patients (Coefficient 0.125; p=0.480; N=19).
