# Supplementary material for: KIR2DL2/DL3+NKs and Helios+Tregs in Peripheral Blood Predict Nivolumab Response in Patients with Metastatic Renal Cell Cancer
Source: PubMed Central journal article supplement — Clin Cancer Res. 2024 Aug 21;30(20):4755–67. doi: 10.1158/1078-0432.CCR-24-0729 (PMC11474171; doi:10.1158/1078-0432.ccr-24-0729), 2024-08-21
Supplement: ccr-24-0729_supplementary_figure_s13_suppfs13.pdf [file ccr-24-0729_supplementary_figure_s13_suppfs13.pdf]

**R**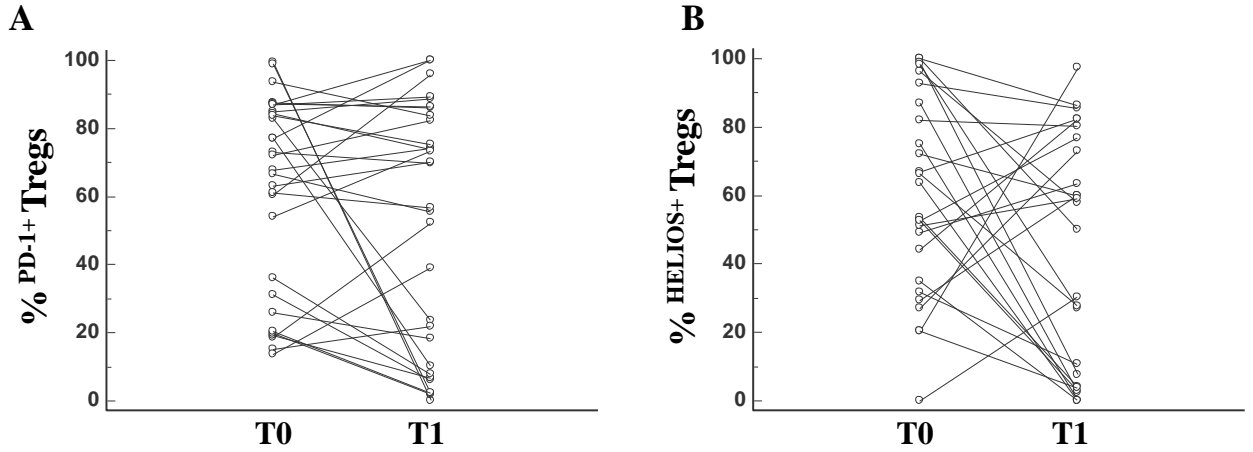**NR**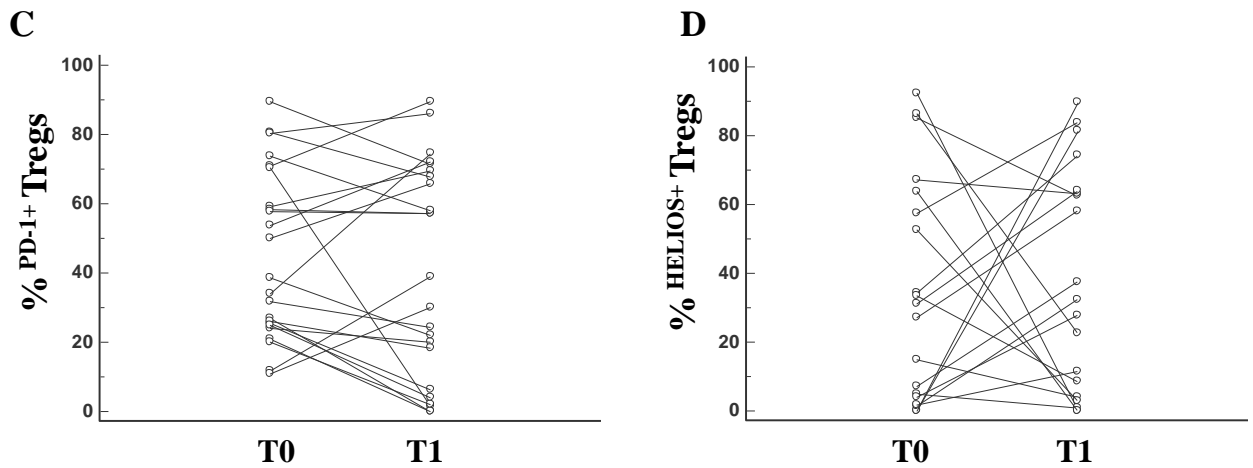

**Supplementary Figure S13. T0-T1 values (after one month of nivolumab) between  $PD-1^+$  Tregs and  $HELIOS^+$  Tregs in Responder and Not Responder patients.**

**(A-B)** Responder patients (R):  $PD-1^+$  Tregs (N=30) median at T0= 69.85 and T1= 63.35, with 12 positive differences and 18 negative differences;  $p= 0.2536$ ;  $HELIOS^+$  Tregs (N=26) median at T0= 58.6 and T1= 53.95, 9 positive differences and 17 negative differences;  $p= 0.0694$ .

**(C-D)** Not Responder patients (NR):  $PD-1^+$  Tregs (N=23) median T0= 38.7 and T1= 38.8, with 8 positive differences and 15 negative differences;  $p= 0.369$ ;  $HELIOS^+$  Tregs (N=19) median at T0= 31.1 and T1= 32.4, with 10 positive differences and 9 negative differences;  $p= 0.650$ . Statistical significance assessed by Wilcoxon matched-pairs signed rank test ( $p<0.05$ ).
