# Supplementary figures and images for: KIR2DL2/DL3+NKs and Helios+Tregs in Peripheral Blood Predict Nivolumab Response in Patients with Metastatic Renal Cell Cancer
Source: PubMed Central journal article supplement — Clin Cancer Res. 2024 Aug 21;30(20):4755–67. doi: 10.1158/1078-0432.CCR-24-0729 (PMC11474171; doi:10.1158/1078-0432.ccr-24-0729), 2024-08-21

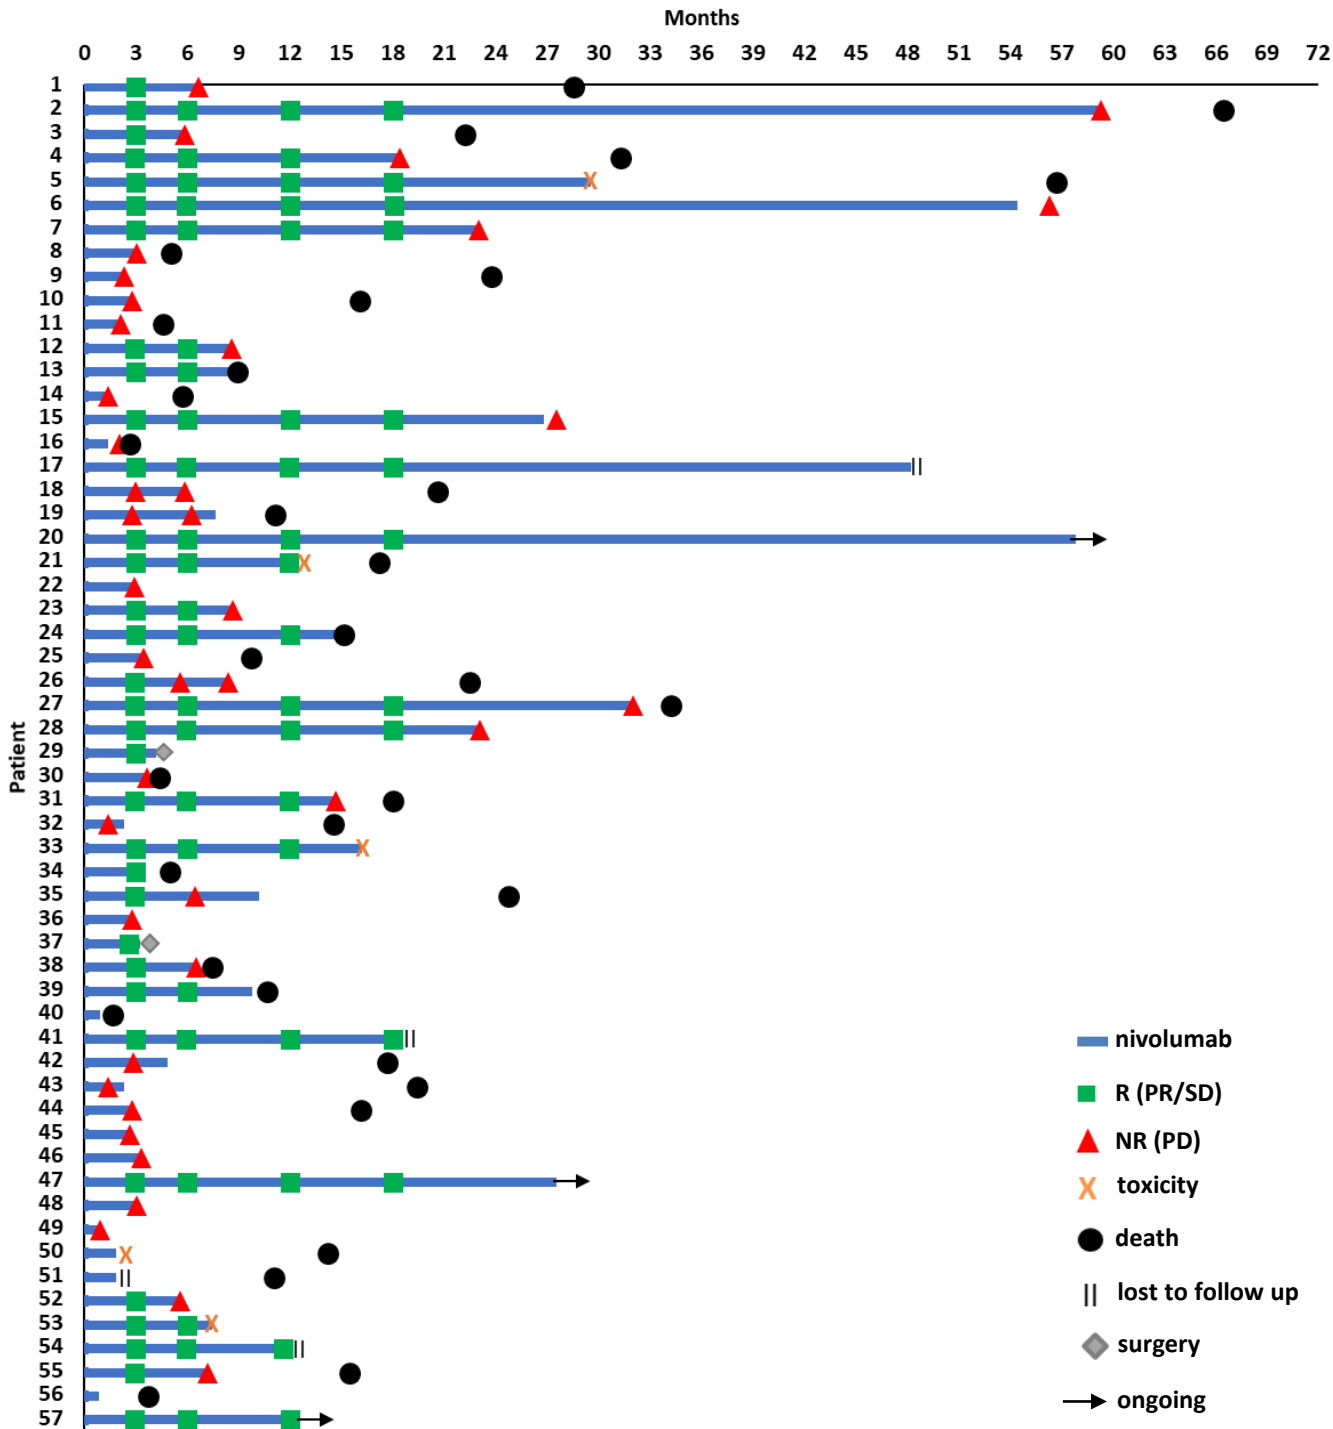

Supplementary Figure S6. Swimmer's plot of nivolumab-treated mRCC patients.

Supplement: ccr-24-0729_supplementary_figure_s6_suppfs6.pdf [file ccr-24-0729_supplementary_figure_s6_suppfs6.pdf]

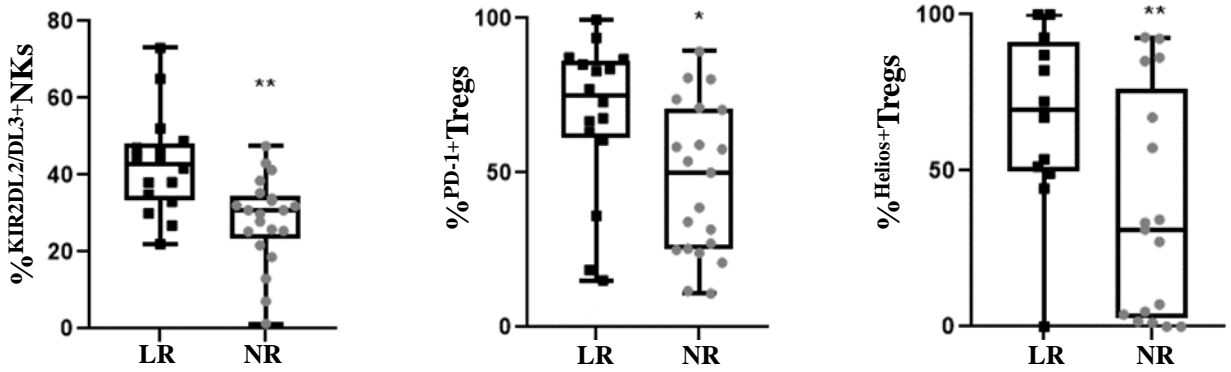

Supplement: ccr-24-0729_supplementary_figure_s7_suppfs7.pdf [file ccr-24-0729_supplementary_figure_s7_suppfs7.pdf]
